# Supplementary material for: Improved photodynamic effect through encapsulation of two photosensitizers in lipid nanocapsules
Source: Royal Society of Chemistry journal article supplement (doi:10.1039/c8tb01759j), 2018-01-01
Supplement: c8tb01759j1.pdf [file c8tb01759j1.pdf]

## SUPPORTING INFORMATION

### Improved Photodynamic Effect through Encapsulation of Two Photosensitizers in Lipid Nanocapsules

Alexandre Barras,<sup>†1\*</sup> Nadia Skandrani,<sup>†1,2</sup> Mariano Gonzalez Pisfil,<sup>3</sup> Solomiya Paryzhak,<sup>4</sup> Tetiana Dumych,<sup>4</sup> Aurélien Hastrate,<sup>5</sup> Laurent Héliot,<sup>3</sup> Tijani Gharbi,<sup>2,6</sup> Hatem Boulahdour,<sup>2,6</sup> Vyacheslav Lehen'kyi,<sup>5</sup> Rostyslav Bilyy,<sup>4</sup> Sabine Szunerits,<sup>1</sup> Gabriel Bidaux,<sup>3</sup> and Rabah Boukherroub,<sup>1\*</sup>

<sup>1</sup>*Univ. Lille, CNRS, Centrale Lille, ISEN, Univ. Valenciennes, UMR 8520 - IEMN, F-59000 Lille, France*

<sup>2</sup>*Laboratoire de Nanomédecine, Imagerie et Thérapeutique, Université de Franche-Comté, 16 Route de Gray, 25030 Besançon, France*

<sup>3</sup>*Laboratoire de Physique des Lasers, Atomes and Molécules, Equipe Biophotonique Cellulaire Fonctionnelle, Parc scientifique de la Haute Borne, Villeneuve d'Ascq, France*

<sup>4</sup>*Danylo Halytsky Lviv National Medical University, 79010 Lviv, Ukraine*

<sup>5</sup>*Univ. Lille, Inserm, UI003 – PHYCEL – Physiologie Cellulaire, LABEX ICST, F-59000 Lille, France*

<sup>6</sup>*CHRU Jean Minjoz, 3 Bd Alexandre Fleming, 25030 Besançon, France*

\*To whom correspondence should be addressed: [alexandre.barras@univ-lille1.fr](mailto:alexandre.barras@univ-lille1.fr); [rabah.boukherroub@univ-lille1.fr](mailto:rabah.boukherroub@univ-lille1.fr); Tel: +333 62 53 17 24; Fax: +333 62 53 17 01. †These authors contributed equally to this work.

---

## Preparation and physical characterization of PS-loaded LNC25

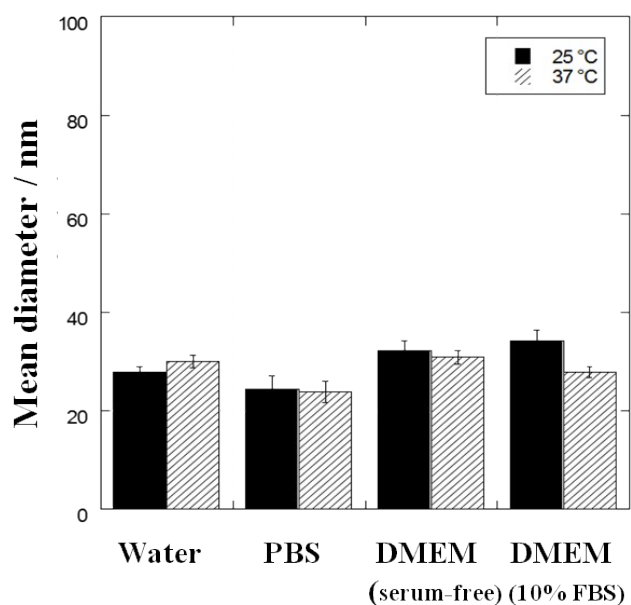

**Figure S1:** Mean diameter of LNC25 in different media after 1 h incubation.

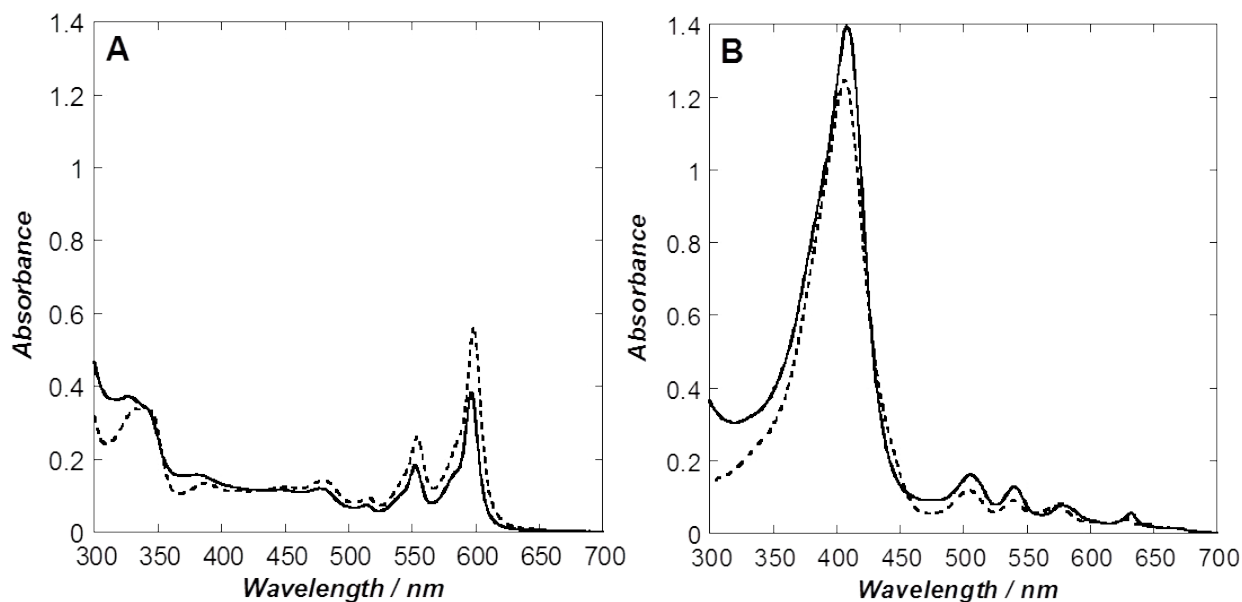

**Figure S2.** Absorption spectra (300 - 700 nm) of Hy dissolved in DMSO (*dotted line*) and Hy-loaded LNC25 (*continuous line*) in water both at 10  $\mu$ M (**A**); PpIX dissolved in DMSO (*dotted line*) and PpIX-loaded LNC25 (*continuous line*) in water both at 10  $\mu$ M (**B**).

## Fluorescence properties of PS-loaded LNC25

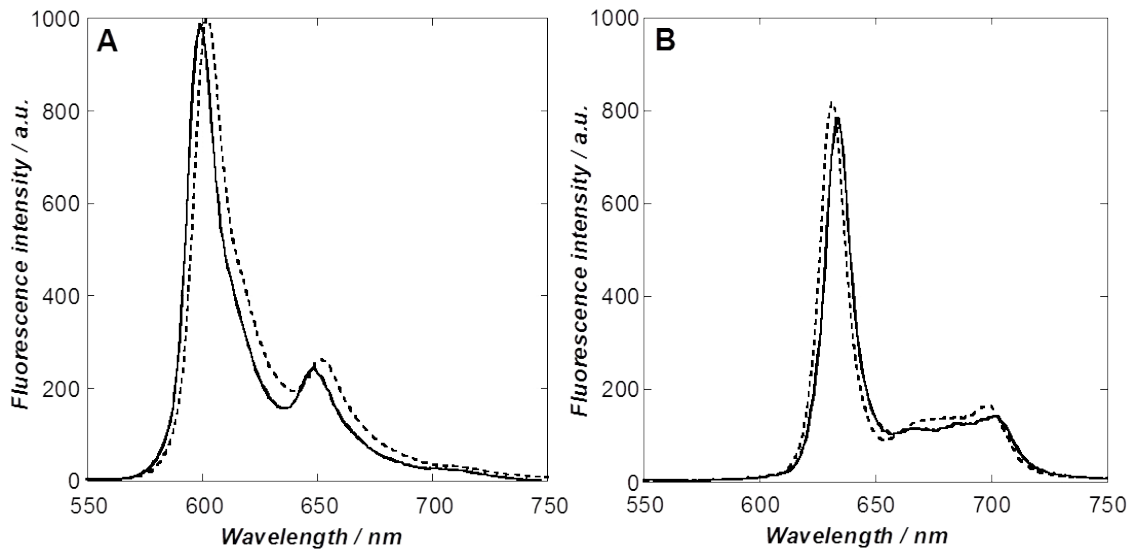

**Figure S3.** Fluorescence emission spectra (550-750 nm) of Hy dissolved in DMSO (*dotted line*) and Hy-loaded LNC25 (*continuous line*) in water both at 2.5  $\mu\text{M}$  (**A**); PpIX dissolved in DMSO (*dotted line*) and PpIX-loaded LNC25 (*continuous line*) in water both at 2.5  $\mu\text{M}$  (**B**). The emission spectra are recorded using an excitation wavelength  $\lambda_{\text{ex}}=330$  nm (**A**) and 410 nm (**B**).

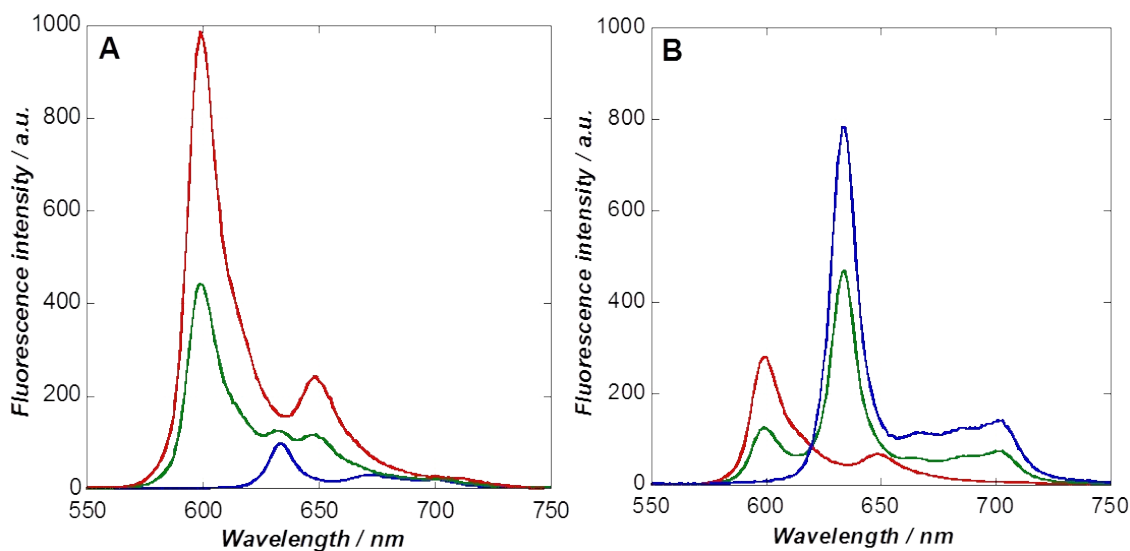

**Figure S4:** Fluorescence emission spectra (550-750 nm) of Hy-loaded LNC25 (*red line*), PpIX-loaded LNC25 (*blue line*) and PpIX-Hy-loaded LNC25 (*green line*) at 2.5  $\mu\text{M}$ . The emission spectra are recorded using an excitation wavelength  $\lambda_{\text{ex}}=330$  nm (**A**) and 410 nm (**B**).

***In vitro* phototoxicity**

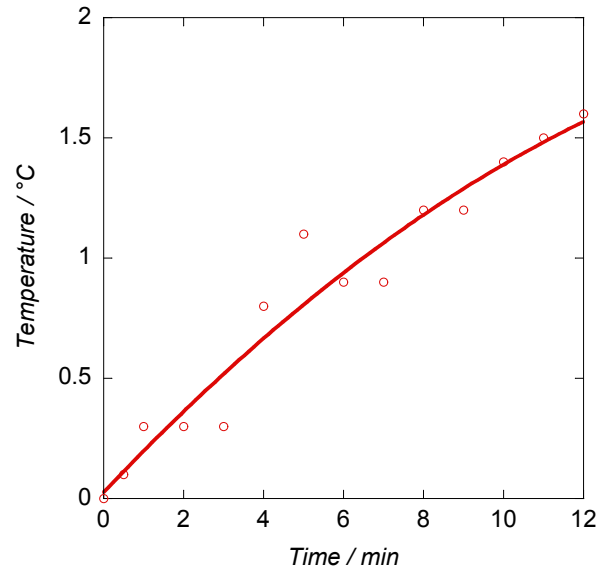

**Figure S5:** Temperature increase of serum-free DMEM during PDT treatment with visible light ( $\lambda > 400$  nm, 10 mW).

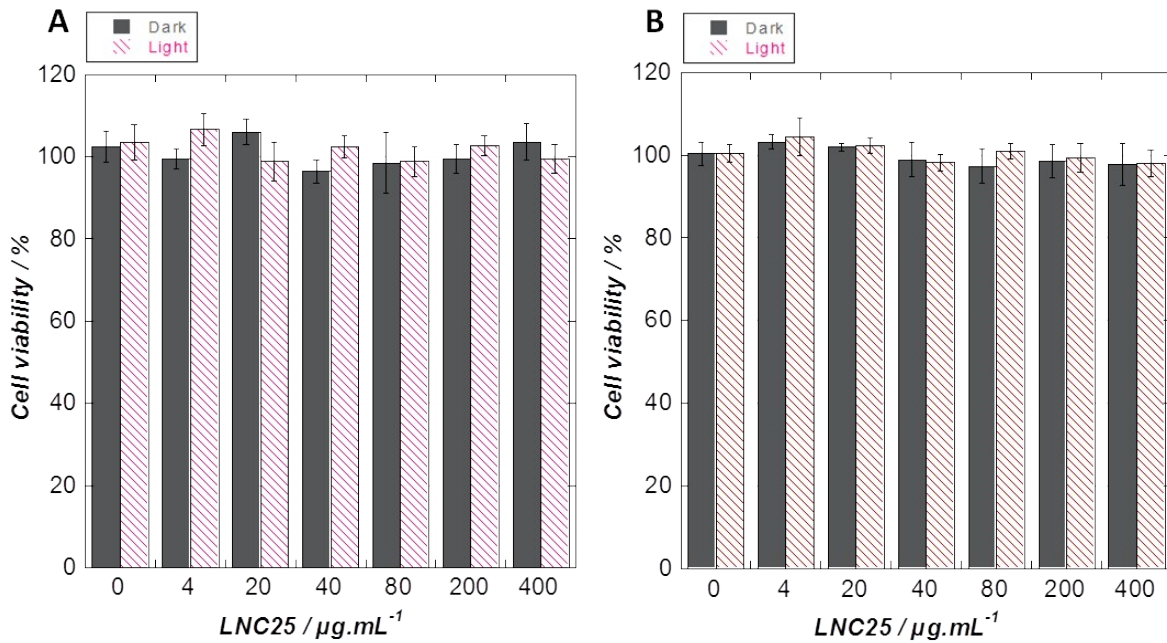

**Figure S6:** *In vitro* phototoxicity of blank LNC25. MTT assay data for blank LNC25 at different concentrations (incubation time 8 h) in the dark or upon visible light irradiation (12 min at 10 mW) using HeLa (A) and MDA-MB-231 (B) cell lines.

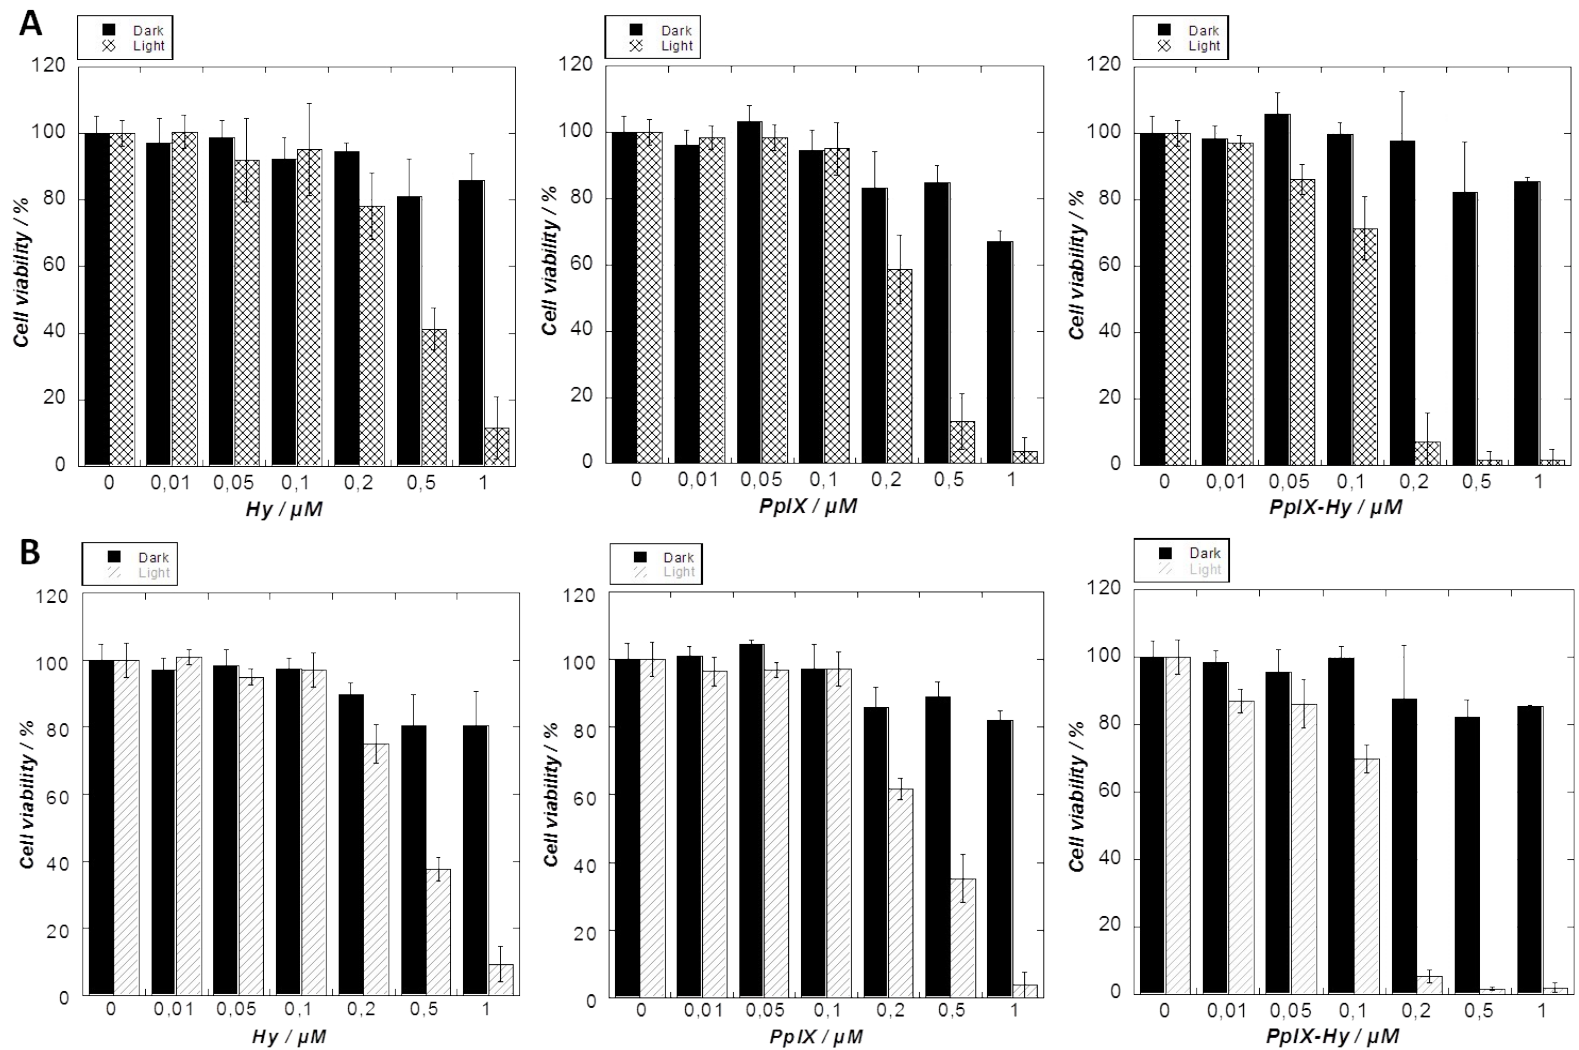

**Figure S7:** *In vitro* phototoxicity of free PS. MTT assay data for free hypericin (Hy), free protoporphyrin IX (PpIX) and 50/50 molar ratio of free Hy/PpIX at different concentrations (incubation time 8 h) in the dark or upon visible light irradiation (12 min at 10 mW) using HeLa (**A**) and MDA-MB-231 (**B**) cell lines.

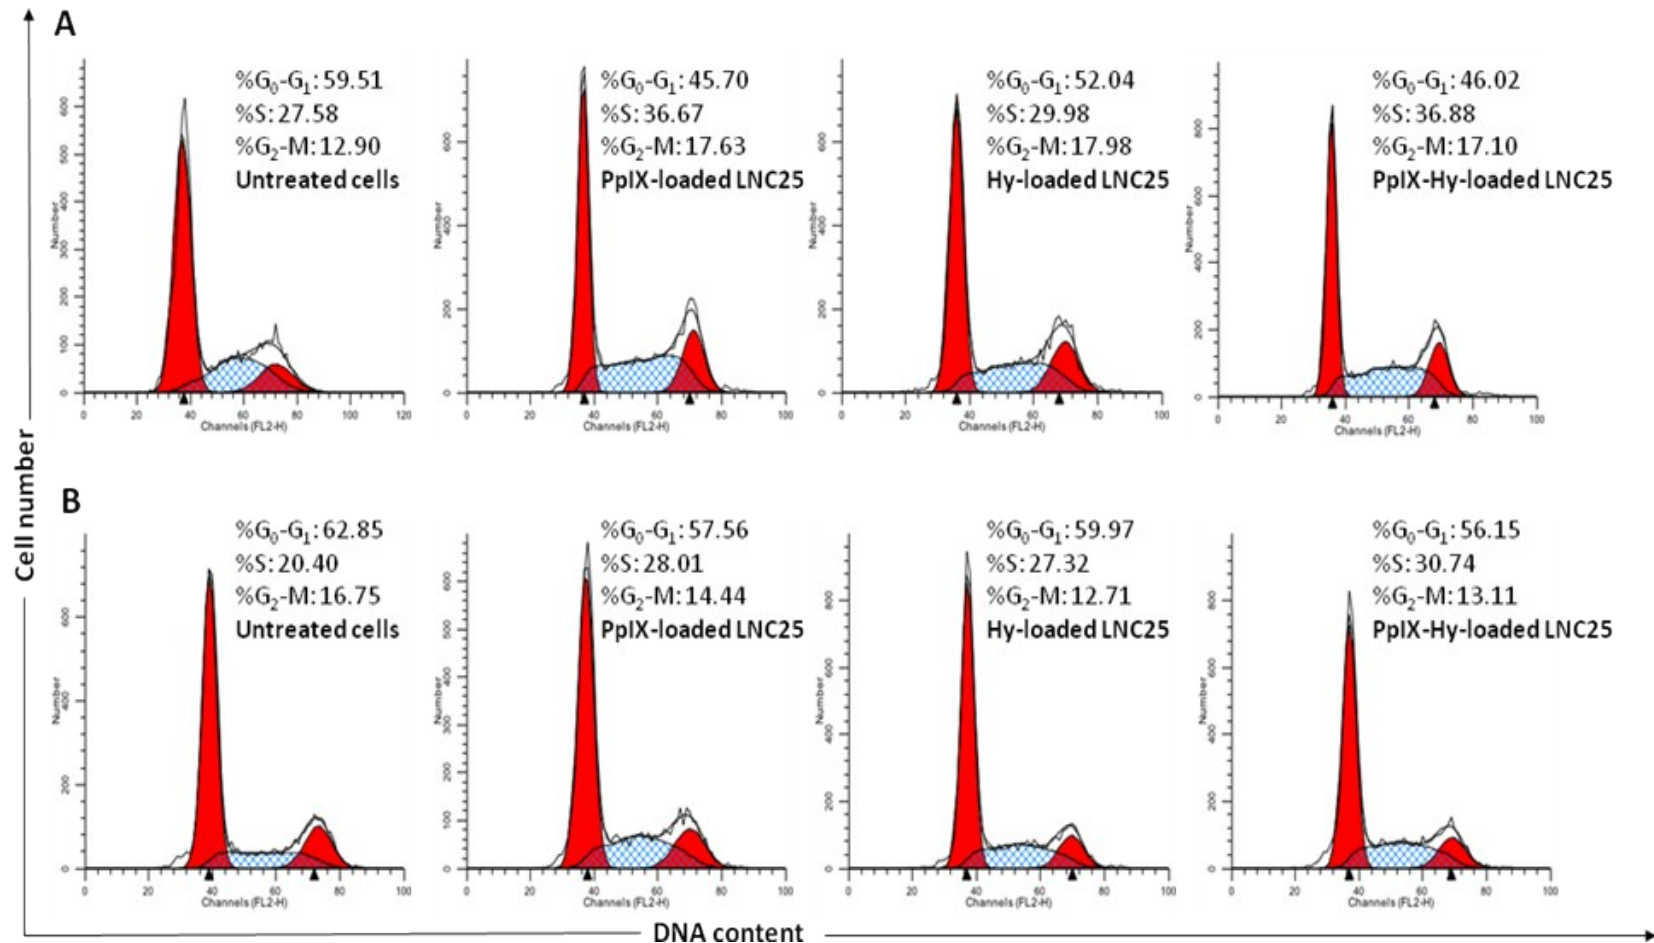

**Figure S8.** DNA flow cytometric analysis. The cells **(A)** MDA-MB-231 and **(B)** HeLa are treated with PS-loaded LNC25 at 0.5  $\mu$ M and irradiated with visible light (10 mW) for 12 min. After fixation and staining with PI, the cells are analysed by flow cytometry. The percentage of cells in G<sub>0</sub>-G<sub>1</sub>, S and G<sub>2</sub>-M are calculated using MODFIT computer software and are represented within the histograms. Statistical difference from the untreated controls: \*p < 0.05; \*\*p < 0.01.

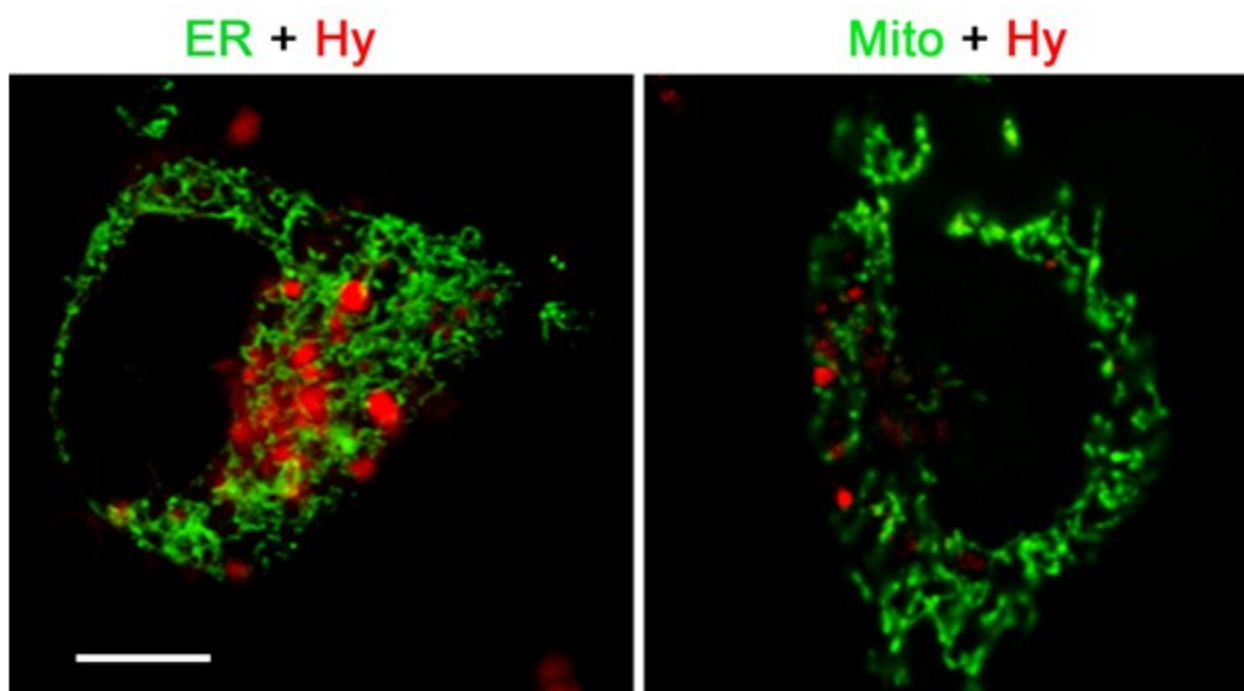

**Figure S9.** Intracellular localization of hypericin in HeLa cells. Cells were transfected with ER-target  $\text{Ca}^{2+}$  biosensor, D1ER (left panel), or Mitochondria-targeted  $\text{Ca}^{2+}$  biosensor, 4mtD3cpv (right panel) for 2 days prior to their treatment with Hy-loaded LNC25 ( $0.5 \mu\text{M}$ ) for 2 h. Fluorescence imaging ( $512 \times 512$  pixels) was performed with a SP5 LSM (Leica Microsystems). Objective:  $\times 60$ . Scale bar:  $5 \mu\text{m}$ .

Before PS

After 20min PS

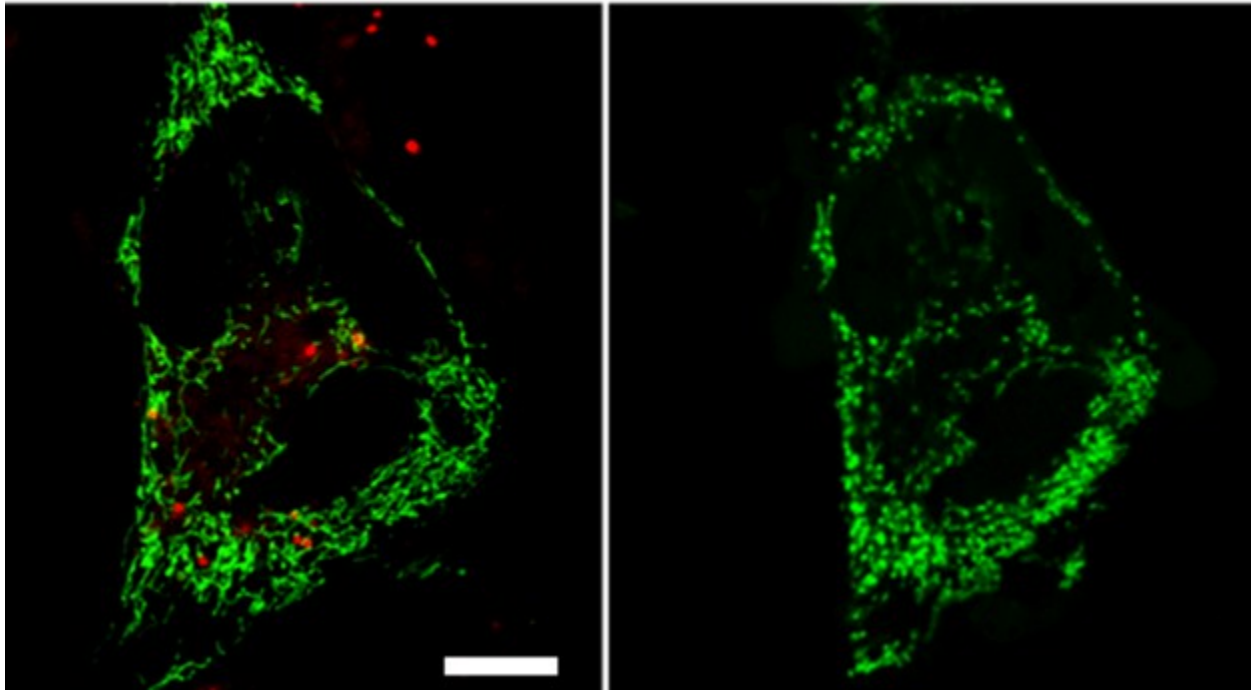

**Figure S10.** Fragmentation of the mitochondrial network induced by the photo-stimulation of PpIX-preloaded HeLa cells. Cells were transfected with Mitochondria-target  $\text{Ca}^{2+}$  biosensor, 4mtD3cpv for 2 days prior to their treatment with PpIX-loaded LNC25 for 2 h. Fluorescence imaging ( $512 \times 512$  pixels) was performed with a SP5 LSM (Leica Microsystems). Objective:  $\times 60$ . Scale bar:  $5 \mu\text{m}$ .



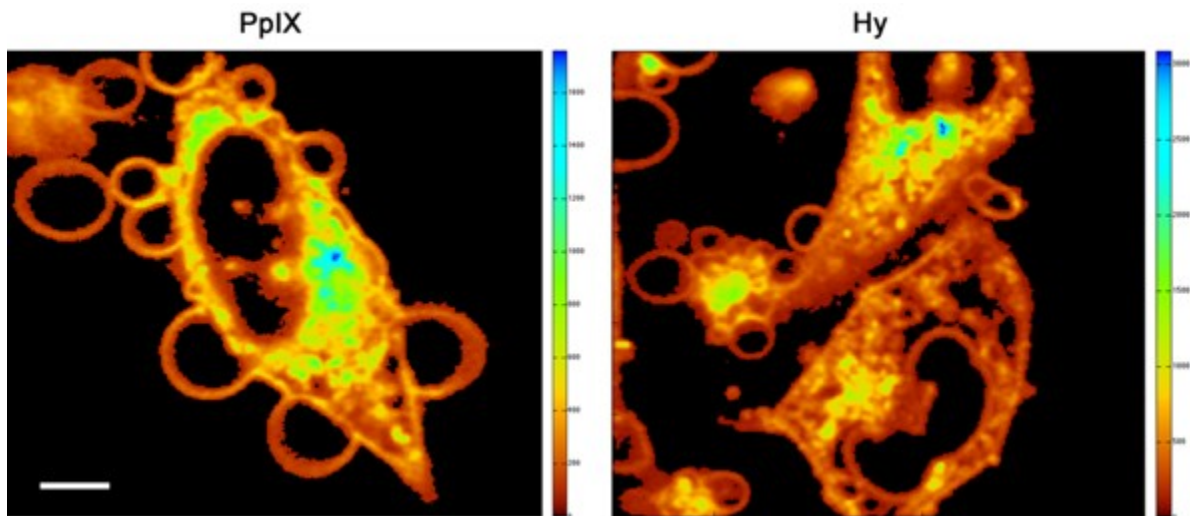

**Figure S11.** Photo-stimulation of PpIX or Hy induces a massive blebbing of the plasma membrane in HeLa cells. After a 2 h incubation with PpIX-loaded LNC25 or Hy-loaded LNC25 (0.5  $\mu$ M), HeLa cells were photo-irradiated with a Laser (405/488/590 nm wavelengths) for 5 min. FLIM images (256 $\times$ 256 pixels) indicate the localization of photosensitizers in the plasma membrane and the formation of big protrusions in this latter. Objective:  $\times$ 60. Scale bar: 5  $\mu$ m.
